# Supplementary material for: Visualizing real-time influenza virus infection, transmission and protection in ferrets
Source: PubMed Central journal article supplement (PMC4366512; doi:10.1038/ncomms7378), 2015-03-06
Supplement: ncomms7378-s1.pdf [file ncomms7378-s1.pdf]

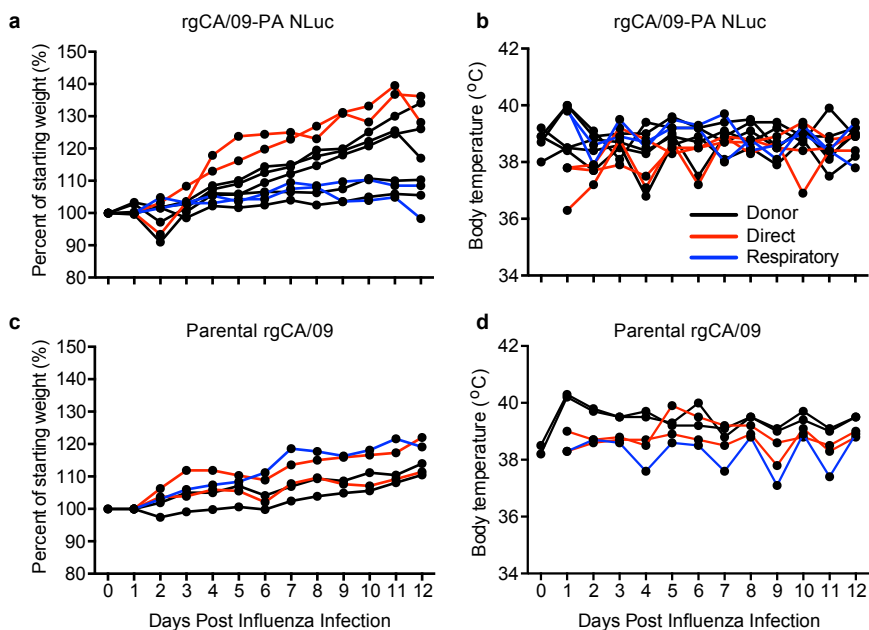

**Supplementary Figure 1. Clinical comparisons of animals infected with CA/09-PA NLuc or parental rgCA/09 influenza virus.** Eight-week-old male ferrets were lightly anesthetized and intranasally inoculated with  $10^5$  TCID<sub>50</sub> CA/09-PA NLuc or rgCA/09 virus. CA/09-PA NLuc infected animals did not show significant (a) weight loss or (b) body temperature increase. Data represents 9 animals (5 donor, 2 direct contact, 2 respiratory contact). Each line represents an individual animal. Similarly, parental rgCA/09 infected animals did not show significant (c) weight loss or (d) body temperature increase. Data represents 5 animals (2 donor, 2 direct contact, 1 respiratory contact). Each line represents an individual animal.
